# Supplementary material for: The dielectric properties of low temperature thermally cross-linked polystyrene and poly(methyl methacrylate) thin films
Source: Royal Society of Chemistry journal article supplement (doi:10.1039/c5ra00848d), 2015-01-01
Supplement: c5ra00848d1.pdf [file c5ra00848d1.pdf]

*Supporting Information for*

## The dielectric properties of low temperature thermal cross-linked polystyrene and poly(methyl methacrylate) thin-films

Shengxia Li,<sup>a</sup> Qing Zhang\*,<sup>a</sup>

<sup>a</sup> Shanghai key lab of polymer and electrical insulation, Department of Polymer Science and Engineering, School of Chemistry and Chemical Engineering, Shanghai Jiaotong University, Shanghai, 200240, China. E-mail: qz14@sjtu.edu.cn; Tel: +86-21-34202726.

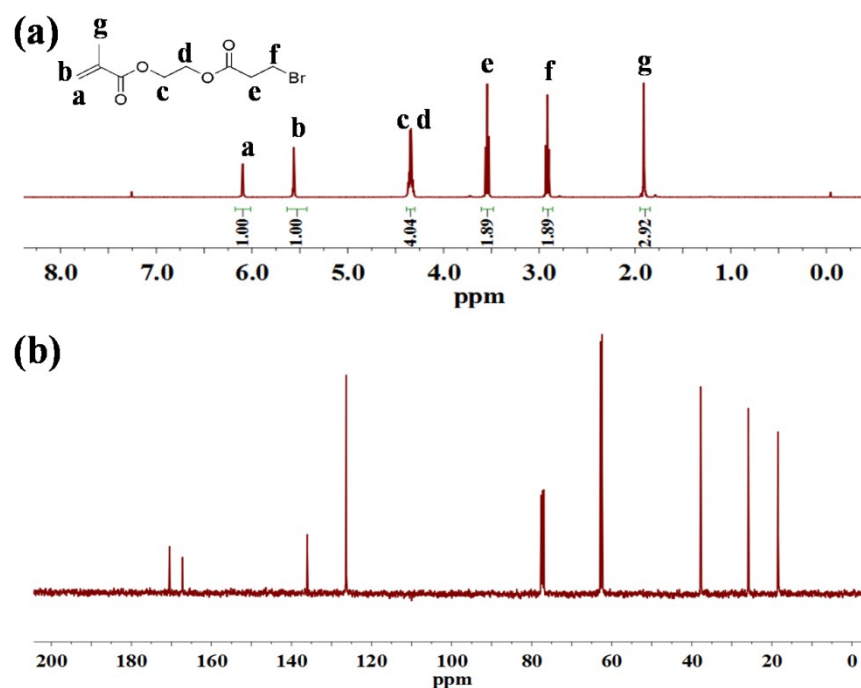

Fig. S1 (a) <sup>1</sup>H NMR and (b) <sup>13</sup>C NMR spectrum of MMA-Br

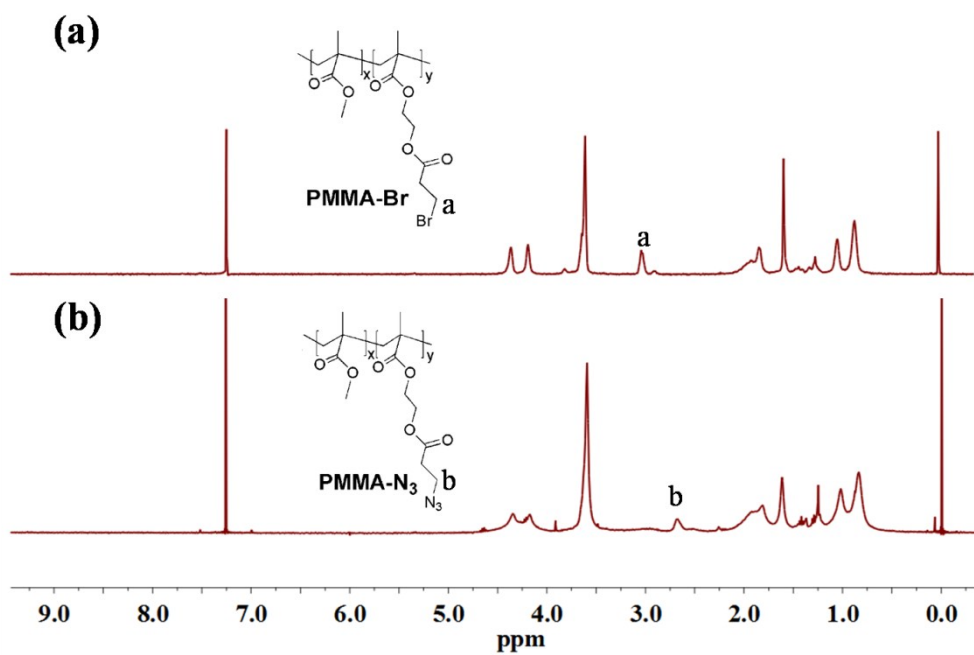

Fig. S2 <sup>1</sup>H NMR spectrum of (a) PMMA-Br and (b) PMMA-N<sub>3</sub>

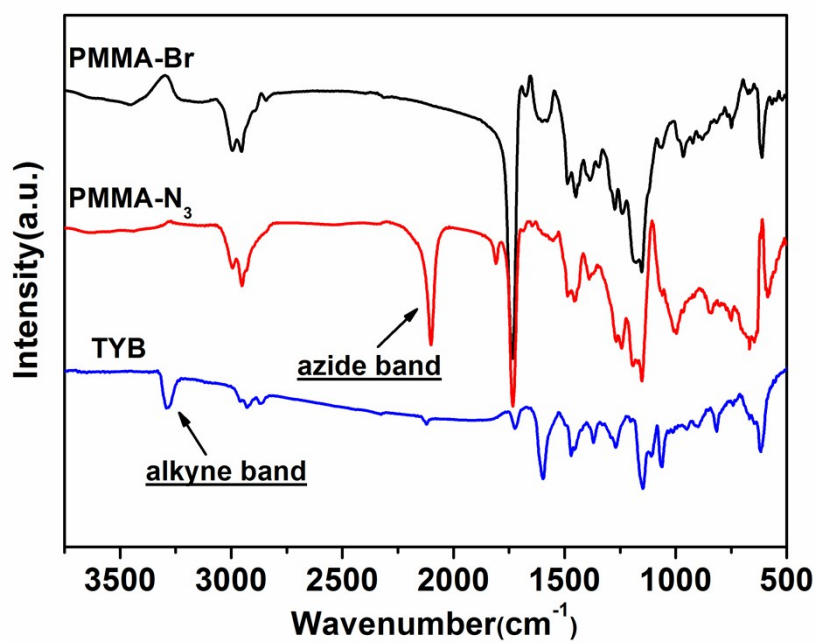

Fig. S3 FTIR spectrum of PMMA-Br, PMMA-N<sub>3</sub> and cross-linker TYB

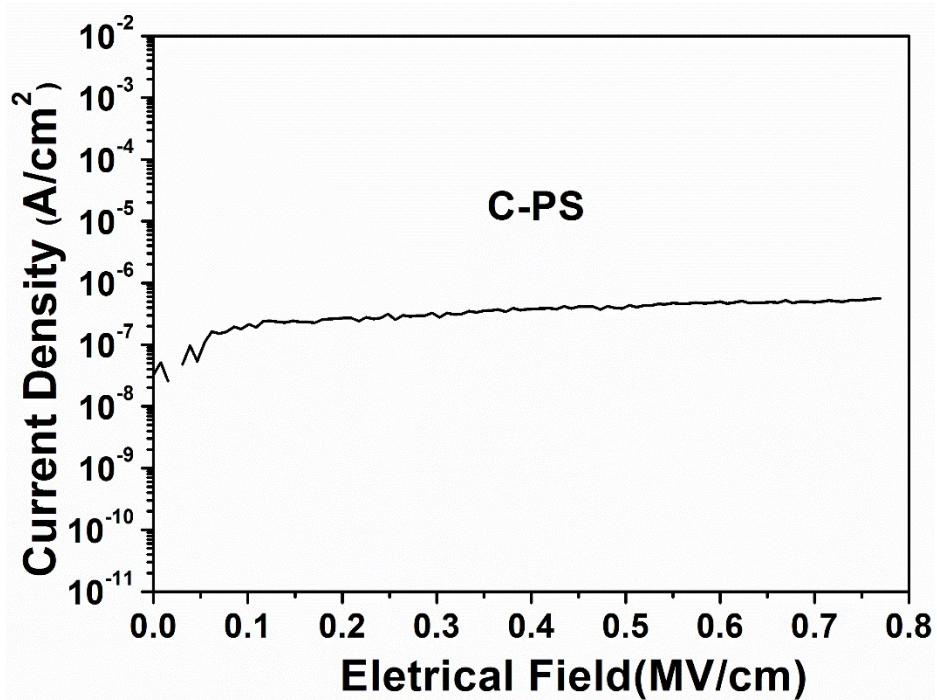

Fig. S4 Current density vs. electric field characteristics of the C-PS thin-film.

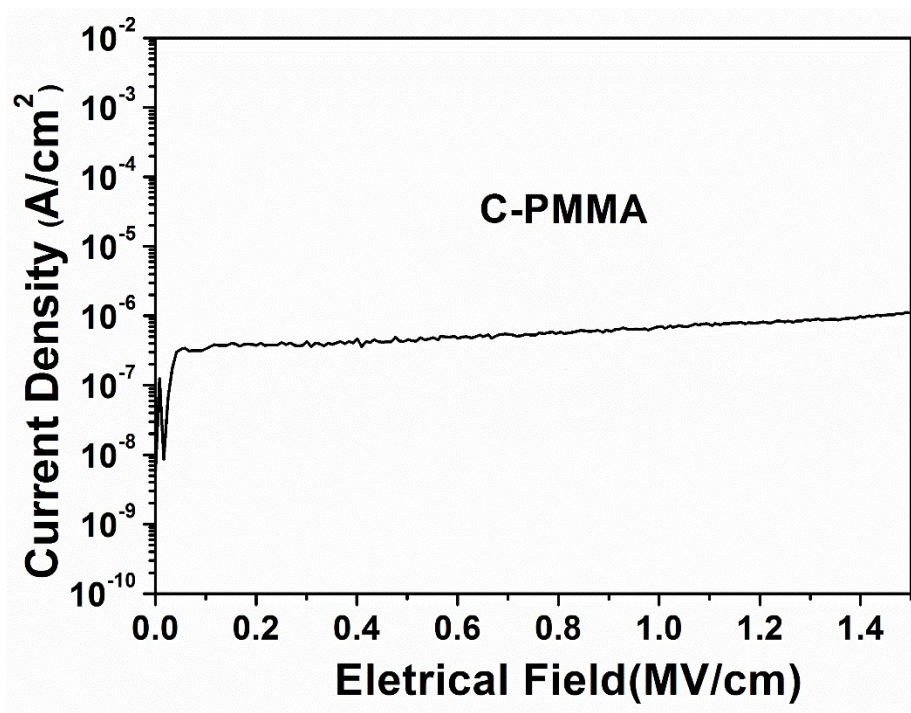

Fig. S5 Current density vs. electric field characteristics of the C-PMMA thin-film.
